# Supplementary material
Source: MDPI journal article supplement (https://www.mdpi.com/2673-3897/1/3/16)

## Supplemental Figure 1

**A**

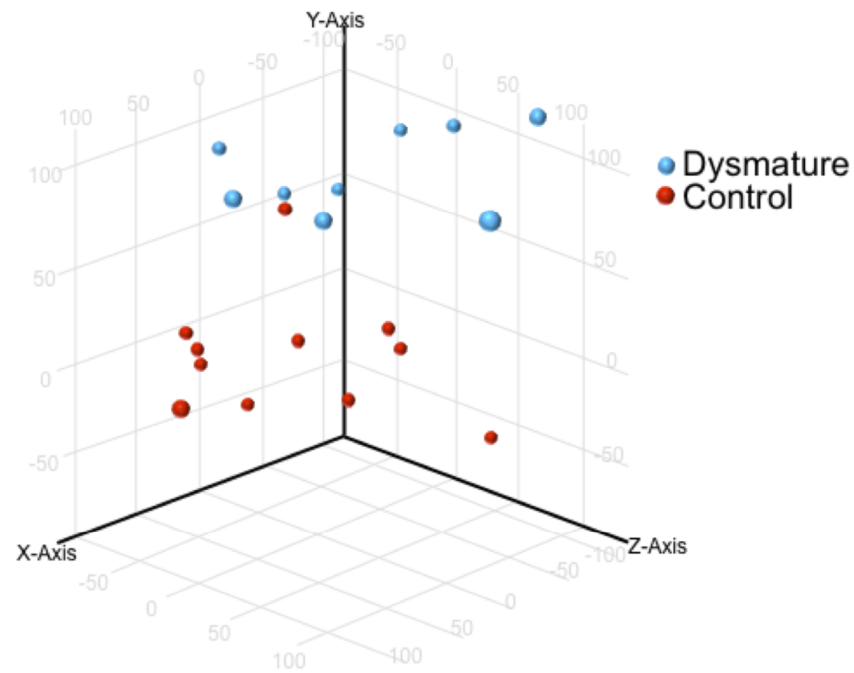

**B**

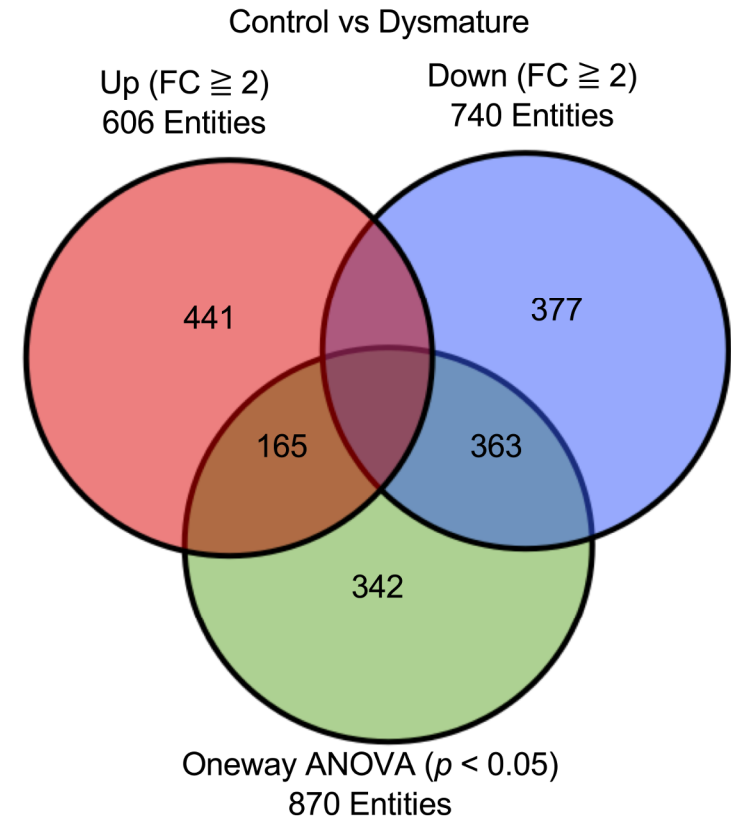

Supplement: s1 [file s1]
